# Supplementary material
Source: MDPI journal article supplement (https://www.mdpi.com/2410-3888/7/2/70)
Supplement: s1 [file s1 › fishes-1595093-supplementary.pdf]

Supplemental File 1: Species and associated gene sequences used to design an eDNA assay for detection of Longnose Darter (*Percina nasuta*) in Missouri, USA.

Caudal fin clips were collected from Gilt Darter (*Percina evides*), Common Logperch (*P. caprodes*), and Longnose Darter (*P. nasuta*) specimens in the St. Francis River in Missouri, USA and from a Slenderhead Darter (*P. phoxocephala*) specimen in the North Fork of the Salt River in Missouri, USA. Tissues were extracted with DNeasy Blood and Tissue Kit (Qiagen), and we amplified a portion of the *cytochrome b*, mitochondrial (*mt-cyb*) gene with primers GLU and THR (Near et al. 2000). PCR reactions consisted of 50 µL total volume with 0.2 U AmplitaqGold (Applied Biosystems), 5 µL 10X Gold Buffer, 0.08 µL dNTPs, 30 µg BSA, 0.5 µM of each primer, 2.5 mM MgCl<sub>2</sub>, and 3 µL genomic DNA. Reactions were subject to an initial denature of 95°C for 10 min followed by 40 cycles of 95°C for 1 min, 55°C for 1 min and 72°C for 2 min. After cycles, a final extension of 72°C for 10 min completed the reaction. We sequenced with terminal primers and internal primers (cytb-intF; 5'CCGGTTCTTCGCCTTCCATTTCTCT and cytb-intR: 5'GTCTTTATAGGAGAAGTAGGGGTGG) designed with an alignment of *Percina* spp. including *P. nasuta*, *P. phoxocephala* and *P. brucethompsoni*. Cycle sequencing and electrophoretic analysis was performed by the University of Missouri DNA Core facility on an ABI 3730xL (Applied Biosystems). We deposited the resulting sequences into GenBank (Table S1; MZ254679, MZ254680, MZ254683, MZ254684, MZ254685, MZ254686).

Supplemental Table 1. Reference *mt-cyb* sequences used to design a qPCR assay for longnose darter (*Percina nasuta*) eDNA in southeast Missouri, USA.

| Species                       | Common Name        | GenBank Accession Numbers                                                                                                                                                                                                                                                                                                                                                                                                                                           |
|-------------------------------|--------------------|---------------------------------------------------------------------------------------------------------------------------------------------------------------------------------------------------------------------------------------------------------------------------------------------------------------------------------------------------------------------------------------------------------------------------------------------------------------------|
| <i>Percina brucethompsoni</i> | Ouachita Darter    | KM209992, KM209993<br>KT880217, EF587839, KC211182, EU379093, EU046670,<br>DQ493484, AF386550, DQ493483, DQ493485, DQ493490,                                                                                                                                                                                                                                                                                                                                        |
| <i>Percina caprodes</i>       | Common Logperch    | EF587840, MZ254679<br>AY374284, AF375947, AF375938, AF375942, AF375945,<br>AF375941, AF375939, AF375946, AF375943, AF375955,<br>AF375954, AF375952, AF375951, AF375948, AF375949,                                                                                                                                                                                                                                                                                   |
| <i>Percina evides</i>         | Gilt Darter        | MZ254680                                                                                                                                                                                                                                                                                                                                                                                                                                                            |
| <i>Percina maculata</i>       | Blackside Darter   | AF045353, AF386557                                                                                                                                                                                                                                                                                                                                                                                                                                                  |
| <i>Percina nasuta</i>         | Longnose Darter    | HQ128264, KM209988, AF386561, KM209987, KM209986,<br>AF386562, KM209989, KM209990, MZ254685, MZ254686<br>KM210000, KM209996, AY374289, AF386563, KM210003,<br>KM210011, KM209994, KM210013, KM210030, KM210028,<br>KM210010, KM209998, KM210029, KM210014, KM210017,<br>KM209995, KM209997, KM210021, KM210022, KM210004,<br>KM210001, KM209999, KM210025, KM210005, KM210002,<br>KM210009, KM210006, KM210007, KM210026, KM210027,<br>KM210008, MZ254683, MZ254684 |
| <i>Percina phoxocephala</i>   | Slenderhead Darter |                                                                                                                                                                                                                                                                                                                                                                                                                                                                     |
| <i>Percina sciera</i>         | Dusky Darter       | HQ128270, EF613205, EF613206, AF386573, EF613204                                                                                                                                                                                                                                                                                                                                                                                                                    |

#### Reference

Near, T.J.; Porterfield, J.C.; Page, L.M. Evolution of cytochrome b and the molecular systematics of Ammocrypta (Percidae: Etheostomatinae). *Copeia* **2000**, *2000*, 701-711.
